# Supplementary material for: A model of preferential pairing between epithelial and dendritic cells in thymic antigen transfer
Source: eLife. 2022 Jan 31;11:e71578. doi: 10.7554/eLife.71578 (PMC8803313; doi:10.7554/eLife.71578)
Supplement: Figure 1—figure supplement 1—source data 1. [file elife-71578-fig1-figsupp1-data1.xlsx]

## Sheet: Sheet1
Figure 1- figure supplement 1
Figure 1- fig. suppl. 1c	Foxn1Cre												CsnbCre												Defa6iCre
	cTEC All	cTEC TdTOM	mTECLow All	mTECLow TdTOM	mTECHigh All	mTECHigh TdTOM	Pre-post All	Pre-post TdTOM	Post All	Post TdTOM	Tuft All	Tuft TdTOM	cTEC All	cTEC TdTOM	mTECLow All	mTECLow TdTOM	mTECHigh All	mTECHigh TdTOM	Pre-post All	Pre-post TdTOM	Post All	Post TdTOM	Tuft All	Tuft TdTOM	cTEC All	cTEC TdTOM	mTECLow All	mTECLow TdTOM	mTECHigh All	mTECHigh TdTOM	Pre-post All	Pre-post TdTOM	Post All	Post TdTOM	Tuft All	Tuft TdTOM
	1.96448	1.92411	54.8372	43.3396	15.3996	15.1507	5.75215	6.04817	13.2939	13.0718	2.11249	2.10576	1.85296	0.741758	60.9904	18.6676	15.5662	51.408	4.66071	15.7624	10.3594	4.38187	0.958113	1.10577	1.51621	0.43573	56.6343	17.4292	9.93821	38.3442	4.31208	18.9542	19.3616	13.0719	1.39637	1.52505
	1.92454	1.89042	58.0583	58.0418	16.0218	15.1676	3.56475	3.58623	12.5695	12.7603	1.01344	0.759452	3.18277	1.54683	54.8809	19.2117	12.8414	43.6926	4.31224	16.1393	16.8586	8.89956	2.8937	1.20074	1.71909	0.755668	58.3909	19.8992	10.8902	40.5542	4.84318	19.8992	16.1648	13.3501	1.66544	1.25945
	1.37958	1.36355	55.9056	56.0565	18.219	17.2494	4.50733	4.55007	11.5962	11.7378	1.08844	0.836027	2.72627	0.742253	56.4675	15.7358	17.5561	51.7629	4.54018	16.3296	11.0481	6.14214	2.07034	1.17833	5.6449	0.52356	59.8418	31.4136	6.83931	14.6597	4.33277	17.2775	14.7207	16.2304	2.33689	4.18848
	2.09456	2.05146	57.5947	57.5064	15.0457	13.9548	4.17885	4.23324	13.023	13.2088	1.06113	0.814835	2.94422	1.91831	59.1572	20.9182	14.0344	42.3753	3.64814	11.1434	11.1028	5.98125	0.978271	1.06692	2.06177	1.14504	59.2962	27.8626	11.9904	31.6794	4.26586	15.8397	12.8511	12.7863	1.66103	2.09924
	1.92083	1.90787	62.6617	62.5373	14.1043	12.2482	3.38803	3.39062	10.9651	11.7739	0.985043	0.720637	2.58477	1.36141	59.1373	19.6769	12.5972	41.768	3.50994	11.7989	13.3554	7.75095	0.85841	1.05282	1.77873	0.70922	58.2898	21.9858	10.8553	32.6241	6.01938	20.3901	13.3688	9.04255	1.78277	1.06383
	1.71135	1.70256	57.3392	58.0366	17.1048	13.6264	4.42198	4.23443	11.7744	12.5949	1.11355	0.785348	3.03244	1.61634	59.8195	21.0124	12.6426	41.3854	3.0089	9.4849	12.0382	6.26998	0.907902	1.03019	2.62019	0.643087	58.7108	25.0804	7.19844	18.328	4.71849	22.1865	17.0602	17.0418	2.97755	2.89389
	2.03781	1.93751	49.9711	49.0366	24.1832	23.9416	5.86725	6.5222	9.65109	10.0523	1.33574	0.984713	2.11709	0.756294	59.458	20.3304	11.9555	46.6116	3.92959	15.2354	13.7242	5.10499	1.29526	1.47278	3.90634	1.2605	60.2852	21.0084	8.97469	16.3865	4.47953	22.6891	13.8502	15.126	2.36222	2.10084
													3.36523	1.27687	59.7228	20.3128	10.3894	43.4986	3.90335	15.748	13.2177	4.63929	1.52026	1.33007
Figure 1- fig. suppl. 1d	Foxn1Cre						CsnbCre						Defa6iCre
	cTEC	mTECLow	mTECHigh	Pre-post	Post	Tuft	cTEC	mTECLow	mTECHigh	Pre-post	Post	Tuft	cTEC	mTECLow	mTECHigh	Pre-post	Post	Tuft
	97.9	99.5	99.6	99.7	99.5	94.9	4.96	3.58	35.3	52.7	6.01	9.24	0.14	0.17	1.54	1.96	0.31	0.45
	96.8	99.3	99.2	99.5	99.7	86.8	6.13	5.72	45.9	60	7.84	5.62	0.19	0.15	1.38	1.62	0.29	0.34
	96.2	99.3	99.4	99.4	99.3	88	3.84	4.79	40.9	59.6	8.5	7.71	0.03	0.17	0.69	1.31	0.35	0.52
	97.8	99.3	99.5	99.7	99.5	84.3	8.56	5.91	41.2	59.6	9.82	10.5	0.33	0.25	1.47	2.22	0.57	0.9
	99.6	98.4	99.9	100	99.9	82.2	5.75	5.23	42.2	60	9.5	10.5	0.23	0.19	1.64	1.93	0.35	0.23
	99.8	97.6	99.8	100	99.9	73.4	7.03	6.88	46.4	63.7	9.73	13.3	0.1	0.17	1.03	1.96	0.4	0.41
	99.6	97.7	99.9	99.9	99.6	87.6	3.11	3.27	38.1	53.9	4.25	10.4	0.13	0.12	0.72	2.08	0.43	0.37
							3.9	3.44	40.4	55.9	4.24	9.06
