# Supplementary material for: A model of preferential pairing between epithelial and dendritic cells in thymic antigen transfer
Source: eLife. 2022 Jan 31;11:e71578. doi: 10.7554/eLife.71578 (PMC8803313; doi:10.7554/eLife.71578)
Supplement: Figure 1—source data 1. [file elife-71578-fig1-data1.xlsx]

## Sheet: Sheet1
Figure 1
Fig. 1c	Cre–	Foxn1Cre	CsnbCre	Defa6iCre
	0	97.9	12.4	0.48
	0	96.8	14.1	0.44
	0	96.2	14.6	0.33
	0	97.8	14.5	0.6
	3.57e-05	99.6	13.3	0.57
	1.35e-05	99.8	14.8	0.42
	1.03e-05	99.6	10.8	0.4
	0.03		10.8
	3.81e-05
	3.91e-05
	1.49e-05
	0
Fig. 1e	Foxn1Cre	CsnbCre	Defa6iCre
	14775	14560	459
	78449	14158	397
	74180	10778	191
	96576	9279	524
	37970	5509	564
	33567	5630	311
	64525	10049	238
		9398
Fig. 1g	cTEC			mTECLow			mTECHigh			Pre-post			Post			Tuft
	Foxn1Cre	CsnbCre	Defa6iCre	Foxn1Cre	CsnbCre	Defa6iCre	Foxn1Cre	CsnbCre	Defa6iCre	Foxn1Cre	CsnbCre	Defa6iCre	Foxn1Cre	CsnbCre	Defa6iCre	Foxn1Cre	CsnbCre	Defa6iCre
	0.979452	0.400309	0.287381	0.790332	0.306074	0.30775	0.983836	3.30254	3.53583	1.05146	3.38197	4.39562	0.9833	0.422983	0.675144	0.996815	1.15411	1.09215
	0.982272	0.486001	0.439574	0.999717	0.350062	0.340794	0.946684	3.40249	3.72392	1.00603	3.74267	4.10871	1.01518	0.527896	0.825876	0.749377	0.614948	0.956225
	0.988383	0.27226	0.0927493	1.0027	0.27867	0.524945	0.946782	2.94843	2.14345	1.00948	3.59668	3.98763	1.01221	0.555944	1.10255	0.768098	0.669145	1.79233
	0.979422	0.651551	0.555366	0.998468	0.353604	0.469888	0.927495	3.01938	2.64207	1.01302	3.05456	3.71313	1.01426	0.538718	0.994956	0.767892	1.09062	1.26381
	0.993252	0.526704	0.398723	0.998014	0.332732	0.377181	0.868406	3.31567	3.00536	1.00076	3.36156	3.3874	1.07376	0.58036	0.676394	0.731579	1.22648	0.896728
	0.994863	0.533016	0.245435	1.01216	0.351264	0.427185	0.796642	3.27349	2.5461	0.957588	3.15229	4.70203	1.06969	0.520841	0.998921	0.705263	1.1347	0.971904
	0.950783	0.357233	0.322681	0.981298	0.341929	0.348484	0.990009	3.89876	1.82586	1.11163	3.87708	5.06506	1.04157	0.37197	1.09211	0.737201	1.13706	0.989351
		0.379429			0.340119			4.18682			4.0345			0.350991			0.874895
