# Supplementary material for: A model of preferential pairing between epithelial and dendritic cells in thymic antigen transfer
Source: eLife. 2022 Jan 31;11:e71578. doi: 10.7554/eLife.71578 (PMC8803313; doi:10.7554/eLife.71578)
Supplement: Figure 2—figure supplement 1—source data 1. [file elife-71578-fig2-figsupp1-data1.xlsx]

## Sheet: Sheet1
Figure 2- figure supplement 1
Figure 2- fig. suppl. 1b	Foxn1Cre							CsnbCre							Defa6iCre
	cDC1	XCR1+ aDC	XCR1– aDC	cDC2	moDC	pDC	Mac	cDC1	XCR1+ aDC	XCR1– aDC	cDC2	moDC	pDC	Mac	cDC1	XCR1+ aDC	XCR1– aDC	cDC2	moDC	pDC	Mac
	64.9	83.6	68.6	68.2	73	18.7	32.5	5	15.2	5.96	2.72	4.47	0.17	0.61	0.19	1.48	0.59	0.043	0.052	0.00691	0.03
	63.8	82.9	66.2	66.9	72.6	18.3	30.5	6.9	31.5	8.55	3.01	7.13	0.75	0.5	0.14	0.86	0.5	0.11	0.094	0.012	0.00852
	67.8	85.6	69.8	68.2	75.9	12.8	33.3	6.39	28.2	7.31	2.72	6.99	0.75	0.64	0.21	1.73	0.52	0.16	0.12	0.00708	0.012
	61.2	79.1	66.8	64.1	71.4	16.9	32.2	6.07	36.6	13.4	3.62	4.46	0.28	0.88	0.13	1.67	0.36	0.25	0.11	0.013	0
	48.4	71	49.8	51.9	67.1	8	20.5	6.91	34.8	9	3.47	4.72	0.3	0.77	0.21	1.45	0.46	0.19	0.08	0.013	0.04
	49.3	71	53.5	58.5	64.2	8.23	21	8.34	39.1	12.4	4	6.23	0.6	0.94	0.23	1.38	0.42	0.055	0.055	0.0096	0.021
	42.3	68.5	51.6	51	62.2	7.22	20.3	7.24	37.7	10.9	3.54	5.99	0.46	0.87	0.26	1.72	0.58	0.13	0.12	0.026	0.029
	51.6	85.1	65.7	61.5	70.2	17.6	25.1	8.18	39.7	13.4	3.52	6.65	0.44	1.01	0.22	1.59	0.42	0.079	0.071	0.012	0.09
	43.6	83	64.3	55.5	65	15.9	22.8	3.63	20.8	8.54	2.19	1.83	0.27	0.68	0.27	1.67	0.43	0.16	0.012	0.012	0.021
	48	86.4	65	59.3	69.2	17	28.3	4.44	20.1	6.98	2.14	2.37	0.16	0.72	0.22	1.41	0.37	0.076	0.095	0.02	0.011
Figure 2- fig. suppl. 1e	Cre–	Foxn1Cre	CsnbCre	Defa6iCre
	0.00368	8.18	0.66	0.024
	0.00689	4.99	0.68	0.02
	0.00141	5.81	0.53	0.043
	0.000887	5.97	0.66	0.028
	0.000661	7.08	0.83	0.035
	0.00997	4.91		0.014
Figure 2- fig. suppl. 1f	Foxn1Cre							CsnbCre							Defa6iCre
	cDC1	XCR1+ aDC	XCR1– aDC	cDC2	moDC	pDC	Mac	cDC1	XCR1+ aDC	XCR1– aDC	cDC2	moDC	pDC	Mac	cDC1	XCR1+ aDC	XCR1– aDC	cDC2	moDC	pDC	Mac
	70.5	92.4	75.9	76.4	66.6	27.9	14.1	9.54	40.3	9.93	4.44	4.38	1.1	0.44	0.23	1.51	0.43	0.085	0.053	0.00844	0.03
	69	89.8	72.4	73.7	71.7	34.7	11.2	7.87	41.6	10.2	3.86	3.53	1.73	0.38	0.22	1.35	0.65	0.22	0.19	0.056	0.068
	72.8	92	75.4	78.3	75.7	33.3	14.2	6.92	28.7	8.1	3.1	2.65	0.82	0.31	0.36	1.85	0.56	0.14	0.051	0.097	0.1
	71.1	87.2	74.8	70.1	77.9	25.3	11.1	8.96	43	11.9	3.93	3.26	0.95	0.43	0.29	1.62	1.01	0.13	0.07	0.018	0.017
	68.4	89.5	70.1	70.9	66.4	28.5	15.1	7.31	46.5	19.3	4.76	8.31	1.04	0.72	0.42	1.22	0.9	0.15	0.11	0	0.026
	69.3	91.8	77.9	76	81.1	24.4	11.2								0.16	1.33	0.37	0.16	0.49	0	0.00761
