# Supplementary material for: A model of preferential pairing between epithelial and dendritic cells in thymic antigen transfer
Source: eLife. 2022 Jan 31;11:e71578. doi: 10.7554/eLife.71578 (PMC8803313; doi:10.7554/eLife.71578)
Supplement: Figure 2—figure supplement 2—source data 1. [file elife-71578-fig2-figsupp2-data1.xlsx]

## Sheet: Sheet1
Figure 2- figure supplement 2
Figure 2- fig. suppl. 2c	Foxn1Cre														CsnbCre														Defa6iCre
	cDC1 All	cDC1 TdTOM	XCR1+ aDC All	XCR1+ aDC TdTOM	XCR1– aDC All	XCR1– aDC TdTOM	cDC2 All	cDC2 TdTOM	moDC All	moDC TdTOM	pDC All	pDC TdTOM	Mac All	Mac TdTOM	cDC1 All	cDC1 TdTOM	XCR1+ aDC All	XCR1+ aDC TdTOM	XCR1– aDC All	XCR1– aDC TdTOM	cDC2 All	cDC2 TdTOM	moDC All	moDC TdTOM	pDC All	pDC TdTOM	Mac All	Mac TdTOM	cDC1 All	cDC1 TdTOM	XCR1+ aDC All	XCR1+ aDC TdTOM	XCR1– aDC All	XCR1– aDC TdTOM	cDC2 All	cDC2 TdTOM	moDC All	moDC TdTOM	pDC All	pDC TdTOM	Mac All	Mac TdTOM
	28.68	37.29	2.29517	3.75084	6.07423	8.66804	4.55382	6.13261	9.69735	14.1499	19.1914	8.63564	7.46337	5.13195	16.9701	45.8726	0.837649	7.11225	3.46746	10.14	3.45145	5.25564	2.65473	6.08398	42.1945	4.22736	6.09016	2.2565	25.5756	50.6667	0.47953	6	3.52914	20.6667	2.59737	1.33333	2.83206	1	27.1881	2	3.34692	0.333333
	23.6289	32.3872	2.12626	3.68743	6.49858	9.49037	4.44666	6.17842	9.24976	14.201	23.956	11.4915	8.08615	5.69456	27.1041	44.3579	2.21972	16.1785	5.12917	11.7785	2.69107	2.07638	2.17425	3.31232	27.0164	4.1404	4.96074	0.655049	27.3909	47.449	0.547172	5.10204	1.50647	7.14286	3.80704	6.12245	4.28472	5.10204	30.6355	6.63265	3.00333	0
	31.5583	44.3447	2.36029	4.09743	4.12581	6.20207	3.77316	5.21746	8.59826	13.4108	22.4239	7.47369	6.43497	4.64346	21.6657	38.495	2.36763	18.0273	4.71523	9.74831	1.34897	1.14987	1.00531	2.18474	29.4482	7.03973	5.62704	1.11154	16.0316	33.6111	0.765777	11.3889	4.26675	17.7778	1.86074	3.33333	4.54207	5.55556	30.8472	1.66667	3.71483	1.11111
	26.2452	34.4072	3.534	5.84851	7.49963	11.0763	3.63857	4.85968	8.75224	13.3181	21.9075	9.88742	6.85308	4.92904	25.3935	38.6605	2.24249	18.1782	5.26583	14.4342	1.53824	1.46262	2.87037	3.5916	30.7613	2.41134	3.13298	0.830133	15.1112	22.4359	0.436869	7.05128	3.25879	18.5897	1.49865	3.84615	3.82799	8.33333	32.9862	6.41026	4.49785	0
	20.3226	34.7222	1.14654	2.8036	3.69337	6.98911	4.00793	7.09323	5.30356	11.9924	31.7015	10.2167	8.9753	6.99101	21.8277	37.6153	3.32342	23.1479	6.63158	11.3922	2.37728	2.05479	3.51824	4.58485	27.877	2.52306	5.09461	1.11127	16.9172	33.5958	0.927726	12.336	4.93182	20.21	1.8013	2.3622	4.95067	5.24934	32.0737	4.19947	3.47995	1.5748
	18.8362	31.8101	1.11761	2.69023	4.16505	8.05488	4.26853	8.3552	5.23294	11.2636	32.8166	10.2709	12.2048	9.55964	25.375	37.929	3.56247	22.8571	6.16769	10.5885	3.60948	2.69991	6.23946	7.42588	23.4335	1.72057	5.94871	1.21294	22.019	34.5656	2.16878	19.5934	7.23665	17.5601	2.1987	1.10906	4.14908	2.5878	26.423	6.09982	3.36222	0.924214
	19.5114	32.2576	0.631147	1.65169	2.72235	5.7659	4.7757	9.21712	5.44862	12.6129	32.2192	10.4599	11.0833	9.56594	21.3297	35.7092	2.74146	21.6021	6.03407	11.5535	3.38567	2.82616	5.39626	7.63124	29.8126	1.82486	4.28292	1.01908	21.4013	30.0144	2.10338	18.6147	6.33049	17.8932	2.95927	2.3088	6.86513	5.05051	25.3746	8.80231	3.44013	1.0101
	17.8111	24.8101	1.05234	2.29339	6.60853	11.9717	3.39991	5.37742	3.77832	6.97932	27.0638	13.3946	8.87062	6.66512	26.3191	42.0478	2.48471	17.8588	5.75479	12.0768	2.95107	2.15239	5.24449	8.10701	23.8531	1.462	5.71495	1.33002	14.7051	20.1492	0.870564	7.9602	4.37438	12.4378	1.42275	1.24378	1.79336	4.47761	48.5248	29.1045	2.01722	0.497512
	16.3204	20.9367	0.761139	1.75886	6.26666	12.3066	4.20123	6.5806	5.83958	11.0393	24.8179	10.9097	9.42688	6.52874	22.0516	52.4446	0.596808	8.01411	1.59964	7.00605	2.96091	4.15827	2.99249	2.74698	42.3391	5.92238	3.86724	1.81452	21.4447	35.6688	1.64745	18.4713	7.50718	23.4076	1.96435	1.91083	4.33148	3.18471	25.5303	3.50319	3.46759	0.318471
	20.1187	26.5409	1.02208	2.28954	4.89663	9.04325	3.99252	6.25912	4.73075	8.78369	26.5577	12.8617	8.71863	6.9784	20.7819	55.3704	0.74218	8.242	1.8821	6.26918	2.7883	3.50723	2.66201	3.81412	39.338	5.43621	3.58625	1.8413	24.7199	37.6603	2.66672	23.8782	7.23867	14.7436	2.2467	1.92308	5.94676	4.48718	23.2133	3.04487	3.28375	0.320513
