# Supplementary material for: A model of preferential pairing between epithelial and dendritic cells in thymic antigen transfer
Source: eLife. 2022 Jan 31;11:e71578. doi: 10.7554/eLife.71578 (PMC8803313; doi:10.7554/eLife.71578)
Supplement: Figure 2—source data 1. [file elife-71578-fig2-data1.xlsx]

## Sheet: Sheet1
Figure 2
Fig. 2c	Cre–	Foxn1Cre	CsnbCre	Defa6iCre
	4.67e-06	5.81	0.61	0.015
	5.26e-06	6.33	0.42	0.034
	8.43e-06	5.49	0.4	0.024
	1.37e-05	9.96	1.33	0.016
	1.64e-05	3.92	0.63	0.021
	1.61e-05	4.86	0.67	0.034
	3.19e-05	3.81	0.58	0.043
	4.9e-05	5.66	0.49	0.03
	1.04e-05	6.81	0.56	0.035
	1.49e-05	5.99	0.29	0.011
Fig. 2d	Foxn1Cre	CsnbCre	Defa6iCre
	0.059139	0.046344	0.032407
	0.064432	0.031909	0.073457
	0.055882	0.030389	0.051852
	0.101381	0.101045	0.034568
	0.039901	0.047863	0.04537
	0.049469	0.050902	0.073457
	0.038781	0.044065	0.092901
	0.057612	0.037227	0.064815
	0.069318	0.042545	0.075617
	0.060971	0.022032	0.023765
Fig. 2g	cDC1			XCR1+ aDC			XCR1– aDC			cDC2			moDC			pDC			Mac
	Foxn1Cre	CsnbCre	Defa6iCre	Foxn1Cre	CsnbCre	Defa6iCre	Foxn1Cre	CsnbCre	Defa6iCre	Foxn1Cre	CsnbCre	Defa6iCre	Foxn1Cre	CsnbCre	Defa6iCre	Foxn1Cre	CsnbCre	Defa6iCre	Foxn1Cre	CsnbCre	Defa6iCre
	1.30021	2.70314	1.98105	1.63423	8.49073	12.5122	1.42702	2.92432	5.856	1.3467	1.52274	0.513341	1.45915	2.29175	0.3531	0.449975	0.100188	0.073562	0.687619	0.370515	0.099594
	1.37066	1.63657	1.73229	1.73423	7.28853	9.32439	1.46038	2.29638	4.74145	1.38945	0.771582	1.60819	1.53528	1.52343	1.19075	0.479693	0.153255	0.216502	0.704236	0.132047	0
	1.40517	1.77677	2.09656	1.73598	7.61408	14.8723	1.50324	2.06741	4.16659	1.38278	0.852403	1.7914	1.55972	2.17321	1.22313	0.333291	0.239055	0.05403	0.721598	0.197535	0.299102
	1.31099	1.52245	1.48472	1.65492	8.10628	16.1405	1.47692	2.7411	5.70449	1.3356	0.950835	2.56641	1.52168	1.25127	2.17695	0.451325	0.078389	0.194332	0.719244	0.264966	0
	1.70855	1.72328	1.9859	2.44526	6.96509	13.297	1.89234	1.71788	4.09787	1.7698	0.864349	1.31139	2.2612	1.30316	1.06033	0.32228	0.090507	0.130932	0.778916	0.218126	0.452537
	1.68878	1.49474	1.56981	2.40712	6.41609	9.03426	1.93392	1.71677	2.42655	1.9574	0.748006	0.504415	2.15243	1.19015	0.623705	0.312979	0.073424	0.230853	0.783266	0.203899	0.274882
	1.65327	1.67416	1.40246	2.61696	7.87976	8.8499	2.11798	1.91471	2.82651	1.93	0.834742	0.780193	2.31488	1.41417	0.735675	0.324649	0.061211	0.346895	0.863098	0.23794	0.293623
	1.39296	1.59762	1.37023	2.17932	7.18747	9.14373	1.81156	2.09856	2.84333	1.58164	0.729361	0.874209	1.8472	1.54582	2.49677	0.494928	0.061292	0.599786	0.75137	0.232726	0.246633
	1.28285	2.37826	1.66329	2.31082	13.4283	11.212	1.96382	4.37976	3.11804	1.56635	1.40439	0.972752	1.89043	0.917957	0.735248	0.439589	0.13988	0.137217	0.692566	0.469201	0.091842
	1.31922	2.66436	1.52348	2.24007	11.1051	8.95416	1.84683	3.33094	2.03678	1.56771	1.25784	0.855957	1.85672	1.4328	0.754559	0.484294	0.138192	0.131169	0.8004	0.513433	0.097606
