# Supplementary material for: A model of preferential pairing between epithelial and dendritic cells in thymic antigen transfer
Source: eLife. 2022 Jan 31;11:e71578. doi: 10.7554/eLife.71578 (PMC8803313; doi:10.7554/eLife.71578)
Supplement: Figure 3—source data 1. [file elife-71578-fig3-data1.xlsx]

## Sheet: Sheet1
Figure 3
Fig. 3b	x axis	y axis	p_value	R
	cTEC	cDC1	0.142782	-0.35956
	mTECLow	cDC1	0.142568	-0.35974
	mTECHigh	cDC1	0.0467607	0.474257
	Pre-post	cDC1	0.254014	0.28365
	Post	cDC1	0.00364707	-0.647836
	Tuft	cDC1	0.254764	0.283221
	cTEC	XCR1+ aDC	2.29371e-06	-0.872808
	mTECLow	XCR1+ aDC	4.62438e-06	-0.860449
	mTECHigh	XCR1+ aDC	4.76364e-07	0.896501
	Pre-post	XCR1+ aDC	1.80515e-07	0.908778
	Post	XCR1+ aDC	0.00283882	-0.660666
	Tuft	XCR1+ aDC	0.00755333	0.607018
	cTEC	XCR1– aDC	0.0072879	-0.609157
	mTECLow	XCR1– aDC	0.0203191	-0.54139
	mTECHigh	XCR1– aDC	0.00261066	0.664829
	Pre-post	XCR1– aDC	0.00286711	0.660169
	Post	XCR1– aDC	0.0434137	-0.480776
	Tuft	XCR1– aDC	0.0717982	0.434192
	cTEC	cDC2	0.00445871	0.637117
	mTECLow	cDC2	0.00102813	0.707266
	mTECHigh	cDC2	0.0070664	-0.610991
	Pre-post	cDC2	0.00132016	-0.696537
	Post	cDC2	0.159056	0.346414
	Tuft	cDC2	0.101503	-0.398414
	cTEC	moDC	0.212488	0.308784
	mTECLow	moDC	0.0949704	0.405554
	mTECHigh	moDC	0.0526172	-0.463656
	Pre-post	moDC	0.129379	-0.37119
	Post	moDC	0.269688	0.274844
	Tuft	moDC	0.295277	-0.261123
	cTEC	pDC	0.104414	0.395339
	mTECLow	pDC	0.00543782	0.62613
	mTECHigh	pDC	0.00672432	-0.613917
	Pre-post	pDC	0.136678	-0.364758
	Post	pDC	0.000194979	0.768443
	Tuft	pDC	0.142667	-0.359657
	cTEC	Mac	0.00012803	0.78153
	mTECLow	Mac	4.46725e-06	0.861087
	mTECHigh	Mac	0.000675786	-0.724295
	Pre-post	Mac	3.94656e-05	-0.813992
	Post	Mac	0.0445276	0.478566
	Tuft	Mac	0.0187018	-0.547417
Fig. 3c	x axis	y axis	p_value	R
	cDC1	Total TdTOM+ TECs	0.264227	-0.277875
	XCR1+ aDC	Total TdTOM+ TECs	2.64931e-07	-0.904116
	XCR1– aDC	Total TdTOM+ TECs	0.0101616	-0.588697
	cDC2	Total TdTOM+ TECs	0.000495153	0.73618
	moDC	Total TdTOM+ TECs	0.0693832	0.437551
	pDC	Total TdTOM+ TECs	0.0274296	0.51866
	Mac	Total TdTOM+ TECs	2.14445e-07	0.906715
Fig. 3b, c Regression input	Sample	Model	cDC1	XCR1+ aDC	XCR1– aDC	cDC2	moDC	pDC	Mac	cTEC	mTECLow	mTECHigh	Pre-post	Post	Tuft	Total TdTOM+ TECs
	695	CsnbCre	1.52245	8.10628	2.7411	0.950835	1.25127	0.0783889	0.264966	0.486001	0.350062	3.40249	3.74267	0.527896	0.614948	0.140642
	696	CsnbCre	1.72328	6.96509	1.71788	0.864349	1.30317	0.0905069	0.218126	0.27226	0.27867	2.94843	3.59668	0.555944	0.669145	0.145464
	926	CsnbCre	1.49474	6.41609	1.71677	0.748006	1.19015	0.0734239	0.203899	0.651551	0.353604	3.01938	3.05456	0.538718	1.09062	0.145471
	927	CsnbCre	1.67416	7.87977	1.91471	0.834742	1.41417	0.061211	0.23794	0.526704	0.332732	3.31567	3.36156	0.58036	1.22648	0.131361
	929	CsnbCre	1.59762	7.18747	2.09856	0.729361	1.54582	0.0612918	0.232726	0.533016	0.351264	3.27349	3.15229	0.520841	1.1347	0.147305
	250	CsnbCre	2.70314	8.49073	2.92432	1.52274	2.29175	0.100188	0.370515	0.400309	0.306074	3.30254	3.38197	0.422983	1.15411	0.1212
	934	CsnbCre	2.37826	13.4283	4.37976	1.40439	0.917957	0.13988	0.469201	0.357233	0.341929	3.89876	3.87708	0.37197	1.13706	0.107393
	935	CsnbCre	2.66436	11.1051	3.33094	1.25784	1.4328	0.138192	0.513433	0.379429	0.340119	4.18682	4.0345	0.350991	0.874895	0.10783
	683	Defa6iCre	1.56981	9.03426	2.42655	0.504415	0.623705	0.230853	0.274882	0.287381	0.30775	3.53583	4.39562	0.675144	1.09215	0.00478309
	684	Defa6iCre	1.40246	8.8499	2.82651	0.780193	0.735675	0.346895	0.293623	0.439574	0.340794	3.72392	4.10871	0.825876	0.956225	0.00443744
	734	Defa6iCre	1.66329	11.2121	3.11804	0.972752	0.735248	0.137217	0.0918422	0.555366	0.469888	2.64207	3.71313	0.994956	1.26381	0.00596559
	736	Defa6iCre	1.52348	8.95416	2.03678	0.855957	0.754559	0.131169	0.0976056	0.398723	0.377181	3.00536	3.3874	0.676394	0.896728	0.00570002
	776	Defa6iCre	1.37023	9.14373	2.84333	0.874209	2.49677	0.599786	0.246633	0.245435	0.427185	2.5461	4.70203	0.998921	0.971904	0.00419392
	921	Foxn1Cre	1.30021	1.63423	1.42702	1.3467	1.45915	0.449975	0.687619	0.988383	1.0027	0.946782	1.00948	1.01221	0.768098	0.990678
	922	Foxn1Cre	1.37066	1.73423	1.46038	1.38945	1.53528	0.479693	0.704236	0.979422	0.998468	0.927495	1.01302	1.01426	0.767892	0.991102
	925	Foxn1Cre	1.40517	1.73598	1.50324	1.38278	1.55972	0.333291	0.721598	0.993252	0.998014	0.868406	1.00076	1.07376	0.731579	0.984265
	926	Foxn1Cre	1.70855	2.44526	1.89234	1.7698	2.2612	0.32228	0.778916	0.994863	1.01216	0.796642	0.957588	1.06969	0.705263	0.983648
	927	Foxn1Cre	1.68878	2.40712	1.93392	1.9574	2.15243	0.312979	0.783266	0.950783	0.981298	0.990009	1.11163	1.04157	0.737201	0.980534
