# Supplementary material for: A model of preferential pairing between epithelial and dendritic cells in thymic antigen transfer
Source: eLife. 2022 Jan 31;11:e71578. doi: 10.7554/eLife.71578 (PMC8803313; doi:10.7554/eLife.71578)
Supplement: Figure 4—figure supplement 1—source data 1. [file elife-71578-fig4-figsupp1-data1.xlsx]

## Sheet: Sheet1
Figure 4- figure supplement 1
Figure 4- fig. suppl. 1c EpCAM+CD45–	RFP–CFP–	RFP+CFP+
	49.6	50.1
	58	41.7
	50.4	49.2
Figure 4- fig. suppl. 1c YFP+	RFP–CFP–	RFP+CFP+
	53.2	3.14
	45.2	1.18
	47.5	2.98
Figure 4- fig. suppl. 1g	CFP+RFP–YFP–							CFP+RFP+							CFP+YFP+							CFP+RFP+YFP+
	cDC1	XCR1+ aDC	XCR1– aDC	cDC2	moDC	pDC	Mac	cDC1	XCR1+ aDC	XCR1– aDC	cDC2	moDC	pDC	Mac	cDC1	XCR1+ aDC	XCR1– aDC	cDC2	moDC	pDC	Mac	cDC1	XCR1+ aDC	XCR1– aDC	cDC2	moDC	pDC	Mac
	25	27.6	33.3	25	40	80	61.5	65.4	62.1	50	60	10	0	15.4	0	0	0	0	0	0	0	0	0	0	5	20	20	7.69
	24	21.9	24.2	31.8	50	60	11.1	56	60.2	39.4	43.2	0	20	38.9	0	0	0	2.27	0	0	0	7.33	4.69	6.06	9.09	31.2	13.3	11.1
	23.5	21.6	20	25.7	44.4	40	55.6	58.2	75.7	40	51.4	33.3	20	22.2	0	0	0	2.86	0	0	0	2.04	0	0	0	11.1	0	0
	21.4	17.3	31.8	20.5	33.3	42.9	44.4	59.4	65.4	40.9	45.5	0	14.3	55.6	0	0	0	0	0	0	0	3.12	6.17	9.09	13.6	22.2	7.14	0
	31.6	15.2	31	23.1	33.3	40	42.9	47.6	67.7	27.6	57.7	0	40	14.3	0.53	1.01	0	0	0	0	0	4.28	5.05	6.9	1.28	44.4	20	0
	31.9	40.7	14.3	33.3	25	80	33.3	47.2	40.7	71.4	58.3	25	0	33.3	0	0	0	0	0	0	0	8.33	7.41	0	0	25	20	0
	29.9	11.8	0	25	54.5	76.9	50	50.6	76.5	0	58.3	9.09	15.4	0	0	0	0	0	0	0	0	9.2	0	33.3	0	27.3	7.69	0
