# Supplementary material for: A model of preferential pairing between epithelial and dendritic cells in thymic antigen transfer
Source: eLife. 2022 Jan 31;11:e71578. doi: 10.7554/eLife.71578 (PMC8803313; doi:10.7554/eLife.71578)
Supplement: Figure 4—source data 1. [file elife-71578-fig4-data1.xlsx]

## Sheet: Sheet1
Figure 4
Fig. 4b	RFP+							YFP+							RFP+YFP+
	cDC1	XCR1+ aDC	XCR1– aDC	cDC2	moDC	pDC	Mac	cDC1	XCR1+ aDC	XCR1– aDC	cDC2	moDC	pDC	Mac	cDC1	XCR1+ aDC	XCR1– aDC	cDC2	moDC	pDC	Mac
	2.39	14.2	2.21	2.46	1.23	0.23	0.34	0.96	7.45	1.41	0.83	0.41	0.13	0.093	1.53	2.61	1.53	2.14	3.7	0.25	0.3
	3.34	16.2	2.55	3.09	1.14	0.24	0.38	1.14	6.94	1.05	1.04	0.27	0.16	0.078	1.37	3.11	2.34	2.86	4.79	0.2	0.32
	3.19	14.8	1.94	2.44	1.39	0.28	0.26	1.05	5.53	0.77	0.79	0.5	0.14	0.053	1.14	1.84	1.32	1.64	2.36	0.18	0.15
	6.2	19.8	5.35	7.1	2.46	0.35	0.42	1.12	5.55	1.67	0.73	0	0.1	0.049	1.93	3.7	2.91	3.6	9.15	0.28	0.48
	4.75	19.7	4.71	5.7	2.72	0.37	0.36	1.12	6.19	1.1	1.31	0.29	0.12	0.064	1.55	3.62	2.29	2.74	7.48	0.24	0.25
	2.52	11.3	3.28	1.69	0.51	0.14	0.13	0.88	4.24	2.21	0.88	0.39	0.12	0.1	1.8	2.21	1.56	1.69	1.8	0.23	0.16
	4.88	13.5	3.62	2.24	0.81	0.38	0.28	1.06	3.77	1.28	0.55	0.6	0.14	0.093	2.04	2.16	1.66	2.15	3.53	0.22	0.22
Fig. 4c	CFP+
	cDC1	XCR1+ aDC	XCR1– aDC	cDC2	moDC	pDC	Mac
	0.38	4.3	0.3	0.59	0.46	0.00853	0.029
	0.53	5.82	0.49	0.9	0.73	0.015	0.033
	0.5	3.44	0.21	0.42	0.41	0.017	0.021
	1.2	6.25	1.02	2.14	1.58	0.08	0.049
	0.96	7.02	1.33	2.04	0.87	0.053	0.041
	0.47	4.94	0.42	0.48	0.26	0.025	0.013
	1.07	4.66	0.27	0.33	0.6	0.11	0.035
