# Supplementary material for: A model of preferential pairing between epithelial and dendritic cells in thymic antigen transfer
Source: eLife. 2022 Jan 31;11:e71578. doi: 10.7554/eLife.71578 (PMC8803313; doi:10.7554/eLife.71578)
Supplement: Figure 5—source data 1. [file elife-71578-fig5-data1.xlsx]

## Sheet: Sheet1
Figure 5
Fig. 5c	Rosa26TdTOMATO	Cd11cCreRosa26TdTOMATO
	0.000757	0.72
	0.000974	0.8
	0.000371	0.49
	0.00359	0.45
	0.00316	1.06
	0.00539	0.38
		0.84
		0.49
		0.49
		1.3
		1.37
Fig. 5d	cDC1	XCR1+ aDC	XCR1– aDC	cDC2	moDC	pDC	Mac
	7.94	29.5	25.3	20	33.7	0.82	1.32
	8.44	22.6	19.8	15.2	32.3	3.08	1.14
	8.46	27.2	17	14.6	36.2	1.12	1.68
	7.31	17.9	13.7	11.9	28.8	1.12	1.28
	9.63	30.6	26	22.1	44	1.51	1.44
	6.77	16.1	13.2	11.5	21.2	0.72	1.21
	7.48	25.8	19.9	14.5	28	1.67	0.84
	6.76	29.9	23.4	17	41.5	1.39	1.03
	7.82	29.1	26.7	20	37.9	0.99	1.44
	7.64	34.3	26.1	19.8	29.9	0.99	1.29
	10.9	31.9	30.2	25.9	51.2	1.61	1.69
