# Supplementary material for: A model of preferential pairing between epithelial and dendritic cells in thymic antigen transfer
Source: eLife. 2022 Jan 31;11:e71578. doi: 10.7554/eLife.71578 (PMC8803313; doi:10.7554/eLife.71578)
Supplement: Supplementary file 1. [file elife-71578-supp1.xlsx]

## Sheet: Sheet1
Supplementary file 1. List of antibodies
Antibody	Manufacturer	Clone	Catalogue number	Dilution
Anti-mouse CCR7-APC	BioLegend	4B12	cat# 120108	1:100
Anti-mouse CCR7-PE/Cy7	BioLegend	4B12	cat# 120124	1:200
Anti-mouse CD11c-APC/Cy7	BioLegend	N418	cat# 117324	1:200
Anti-mouse CD11c-Biotin	eBioscience	N418	cat# 13-0114-82	1:100
Anti-mouse CD14-APC	BioLegend	Sa2-8	cat# 123312	1:100
Anti-mouse CD14-FITC	BioLegend	Sa2-8	cat# 123308	1:100
Anti-mouse CD301b (Mgl2)-PE/Cy7	BioLegend	URA-1	cat# 146807	1:200
Anti-mouse CD326 (EpCAM)-PE/Cy7	BioLegend	G8.8	cat# 118215	1:3000
Anti-mouse CD45.1-PerCP/Cy5.5	BioLegend	A20	cat# 110727	1:150
Anti-mouse CD45.2-FITC	BioLegend	104	cat# 109806	1:150
Anti-mouse CD45-BV605	BioLegend	30-F11	cat# 103155	1:100
Anti-mouse CX3CR1-BV421	BioLegend	SA011F11	cat# 149023	1:200
Anti-mouse I-A/I-E-BV711	BioLegend	M5/114.15.2	cat# 107625	1:500
Anti-mouse I-A/I-E-PB	BioLegend	M5/114.15.2	cat# 138606	1:500
Anti-mouse L1CAM-APC/Cy7	Novus Biologicals	UJ127.11	cat# 2682APCCY7	1:50
Anti-mouse Ly-51-AF647	BioLegend	6C3	cat# 108311	1:200
Anti-mouse Ly6D-FITC	Biolegend	49-H4	cat# 107620	1:200
Anti-mouse/human CD45R/B220-BV785	BioLegend	RA3-6B2	cat# 103246	1:100
Anti-mouse/rat XCR1-APC	Biolegend	ZET	cat# 148206	1:200
Anti-mouse/rat XCR1-BV421	BioLegend	ZET	cat# 148216	1:200
Anti-mouse/rat XCR1-PerCP/Cy5.5	BioLegend	ZET	cat# 148208	1:200
Fixable Viability Dye-eFluor 506	eBioscience	-	cat# 65-0866-14	1:300
Streptavidin-APC/Cy7	BioLegend	-	cat# 405208	1:500
